# Supplementary material for: High-density lipoprotein contribute to G0-G1/S transition in Swiss NIH/3T3 fibroblasts
Source: PubMed Central journal article supplement (PMC4671069; doi:10.1038/srep17812), 2015-12-07
Supplement: srep17812-s3.pdf [file srep17812-s3.pdf]

## **High-density lipoprotein contribute to G0-G1/S transition in Swiss NIH/3T3 fibroblasts**

Fabrizio Angius, Stefano Spolitu, Sabrina Uda, Stefania Deligia, Alessandra Frau, Sebastiano Banni, Maria Collu, Simonetta Accossu, Clelia Madeddu, Roberto Serpe, Barbara Batetta

### **Movie legends**

**Movie 1.** Dil-HDL in quiescent NIH/3T3 fibroblasts.

Living contact-inhibited cells at the concentration of about  $4.0 \times 10^4$  cells/cm<sup>2</sup> (stationary growth), were incubated for 1h at 4°C with Dil-HDL, then the cells were washed with PBS and the Dil fate has been followed for up to 1h at RT.

**Movie 2.** Dil-HDL in proliferating NIH/3T3 fibroblasts.

Cells were diluted at  $1.5 \times 10^4$  cells/cm<sup>2</sup>. After 24h culture (exponential growth) cells were incubated for 1h at 4°C with Dil-HDL, then the cells were washed with PBS and the Dil fate has been followed for up to 1h at RT.
